# Supplementary material for: Density functional theory calculations for the band gap and formation energy of Pr4−xCaxSi12O3+xN18−x; a highly disordered compound with low symmetry and a large cell size
Source: Royal Society of Chemistry journal article supplement (doi:10.1039/c7cp03247a), 2017-01-01
Supplement: c7cp03247a1.pdf [file c7cp03247a1.pdf]

## Electronic Supplementary Information (ESI)

# Density Functional Theory Calculations for Band Gap and formation energy of $\text{Pr}_{4-x}\text{Ca}_x\text{Si}_{12}\text{O}_{3+x}\text{N}_{18-x}$ ; a Highly Disordered Compound with Low Symmetry and a Large Cell Size

Sung Un Hong,<sup>‡,a</sup> Satendra Pal Singh,<sup>‡,a</sup> Myoungho Pyo,<sup>b</sup> Woon Bae Park,<sup>\*,a</sup> and Kee-Sun Sohn<sup>\*,a</sup>

<sup>a</sup>Faculty of Nanotechnology & Advanced Materials Engineering, Sejong University, Seoul, 143-747, South Korea

<sup>b</sup>Department of Printed Electronics, Sunchon National University, Suncheon, Chonnam, 540-742, South Korea

### Corresponding Authors

\*Kee-Sun Sohn ([kssohn@sejong.ac.kr](mailto:kssohn@sejong.ac.kr))

\*Woon Bae Park ([imjinpp@sejong.ac.kr](mailto:imjinpp@sejong.ac.kr))

‡These authors contributed equally

### Table of Content:

1. **Table S1.** Calculated VASP energy of all the reactants in the Chemical reaction scheme adopted for the formation of  $\text{Pr}_{4-x}\text{Ca}_x\text{Si}_{12}\text{O}_{3+x}\text{N}_{18-x}$ .
2. **Fig. S1** The  $\{F(R) \text{ } hv\}^2$  vs. energy (hv) plot, the straight line in the plot intersects the energy axis at 4.11 eV.
3. **Fig. S2** The HSE06-calculated band gap vs. the GGA-PBE-calculated band gap for several representative configurations, showing a certain correlation.
4. **Fig. S3** Configurations from 2<sup>nd</sup> to 5<sup>th</sup> generation viewed in the b direction, along with total DOS and calculated band gap energies for 3-9 configuration.
5. **Fig. S4** Configurations from 2<sup>nd</sup> to 5<sup>th</sup> generation viewed in the b direction, along with total DOS and calculated band gap energies for 2-8 configuration.
6. Details of the agreement factors obtained in the Rietveld Refinement using Fullprof program.

**Table S1.** Calculated VASP energy of all the reactants in the chemical reaction scheme adopted for the formation of  $\text{Pr}_{4-x}\text{Ca}_x\text{Si}_{12}\text{O}_{3+x}\text{N}_{18-x}$ .

|              | Space Group        | KJ/mol   |
|--------------|--------------------|----------|
| <b>Ca3N2</b> | R-3c               | -2541.95 |
|              | Ia-3               | -2548.2  |
|              | C2/m               | -2523.48 |
|              | P-3m1              | -2480.54 |
| <b>PrN</b>   | Fm-3m              | -1506.82 |
|              | P4/nmm             | -1448.37 |
| <b>Si3N4</b> | P31c               | -5525.45 |
|              | P6 <sub>3</sub>    | -5525.52 |
|              | Fd-3m              | -5426.31 |
|              | I-43d              | -5458.38 |
|              | P6 <sub>3</sub> /m | -5525.51 |
|              | Pnma               | -5332.01 |
| <b>SiO2</b>  | P63/mmc            | -2236.43 |
|              | P42/mnm            | -2233.89 |
|              | P <sub>3</sub> 221 | -2287.38 |
|              | Cmcm               | -2287.14 |
|              | Immm               | -2286.46 |
|              | P6222              |          |
|              | P3 <sub>1</sub> 21 | -2282.05 |

We adopted the most frequent entry in the ICSD for each binary reactant compound and used their VASP energy for the formation energy calculation. The adopted entries are marked in yellow.

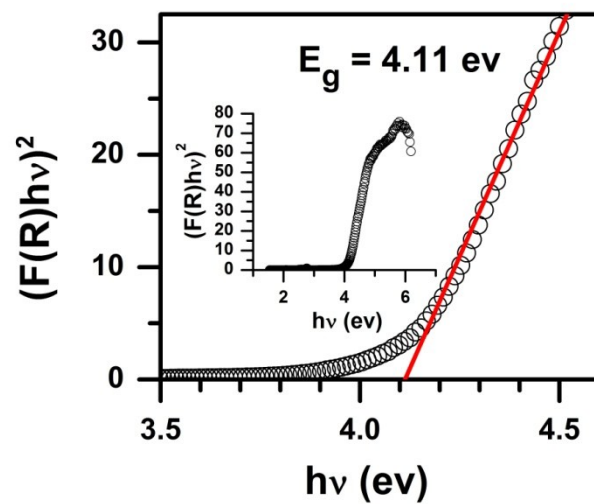

**Fig. S1** The  $\{F(R) h\nu\}^2$  vs. energy ( $h\nu$ ) plot, the straight line in the plot intersects the energy axis at **4.11** eV.

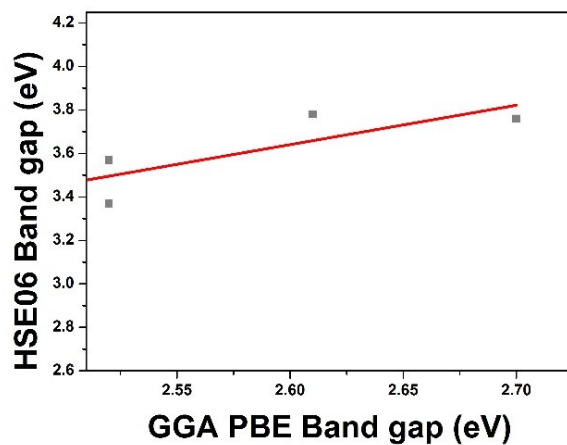

**Fig. S2** The HSE06-calculated band gap vs. the GGA-PBE-calculated band gap for several representative configurations, showing a certain correlation.

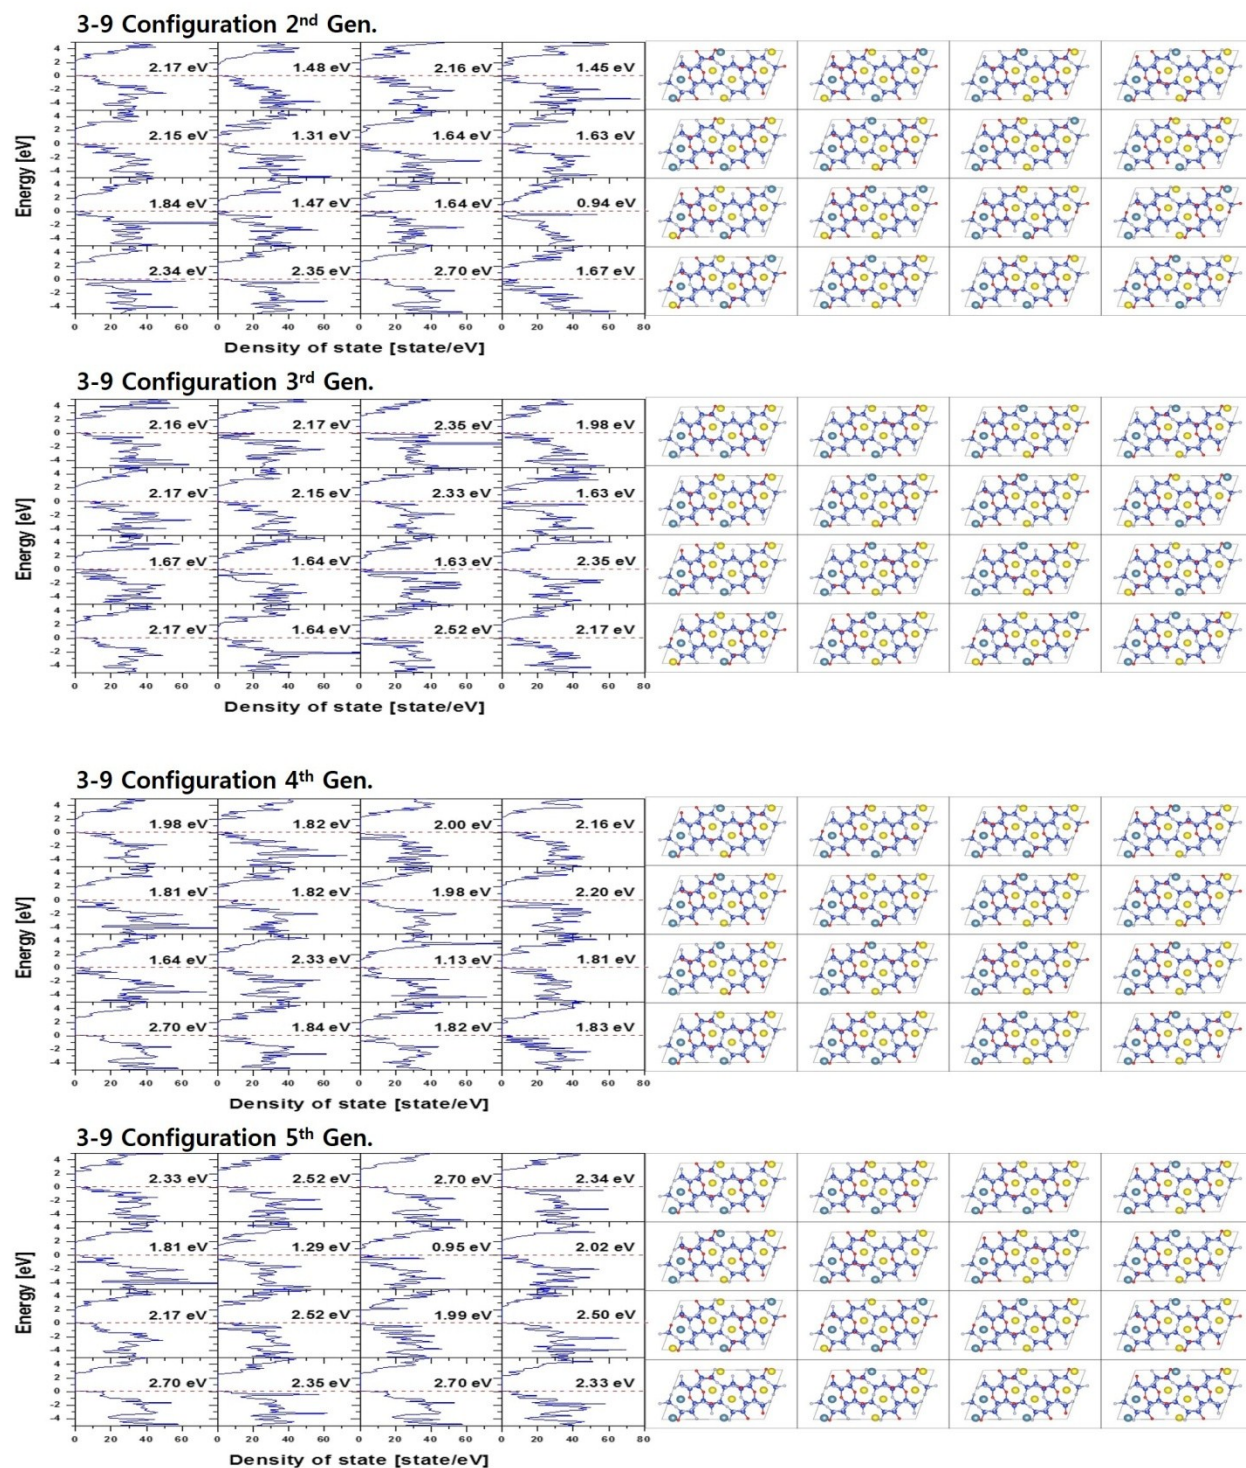

**Fig. S3** Configurations from 2<sup>nd</sup> to 5<sup>th</sup> generation viewed in the b direction, along with total DOS and calculated band gap energies for 3-9 configuration.



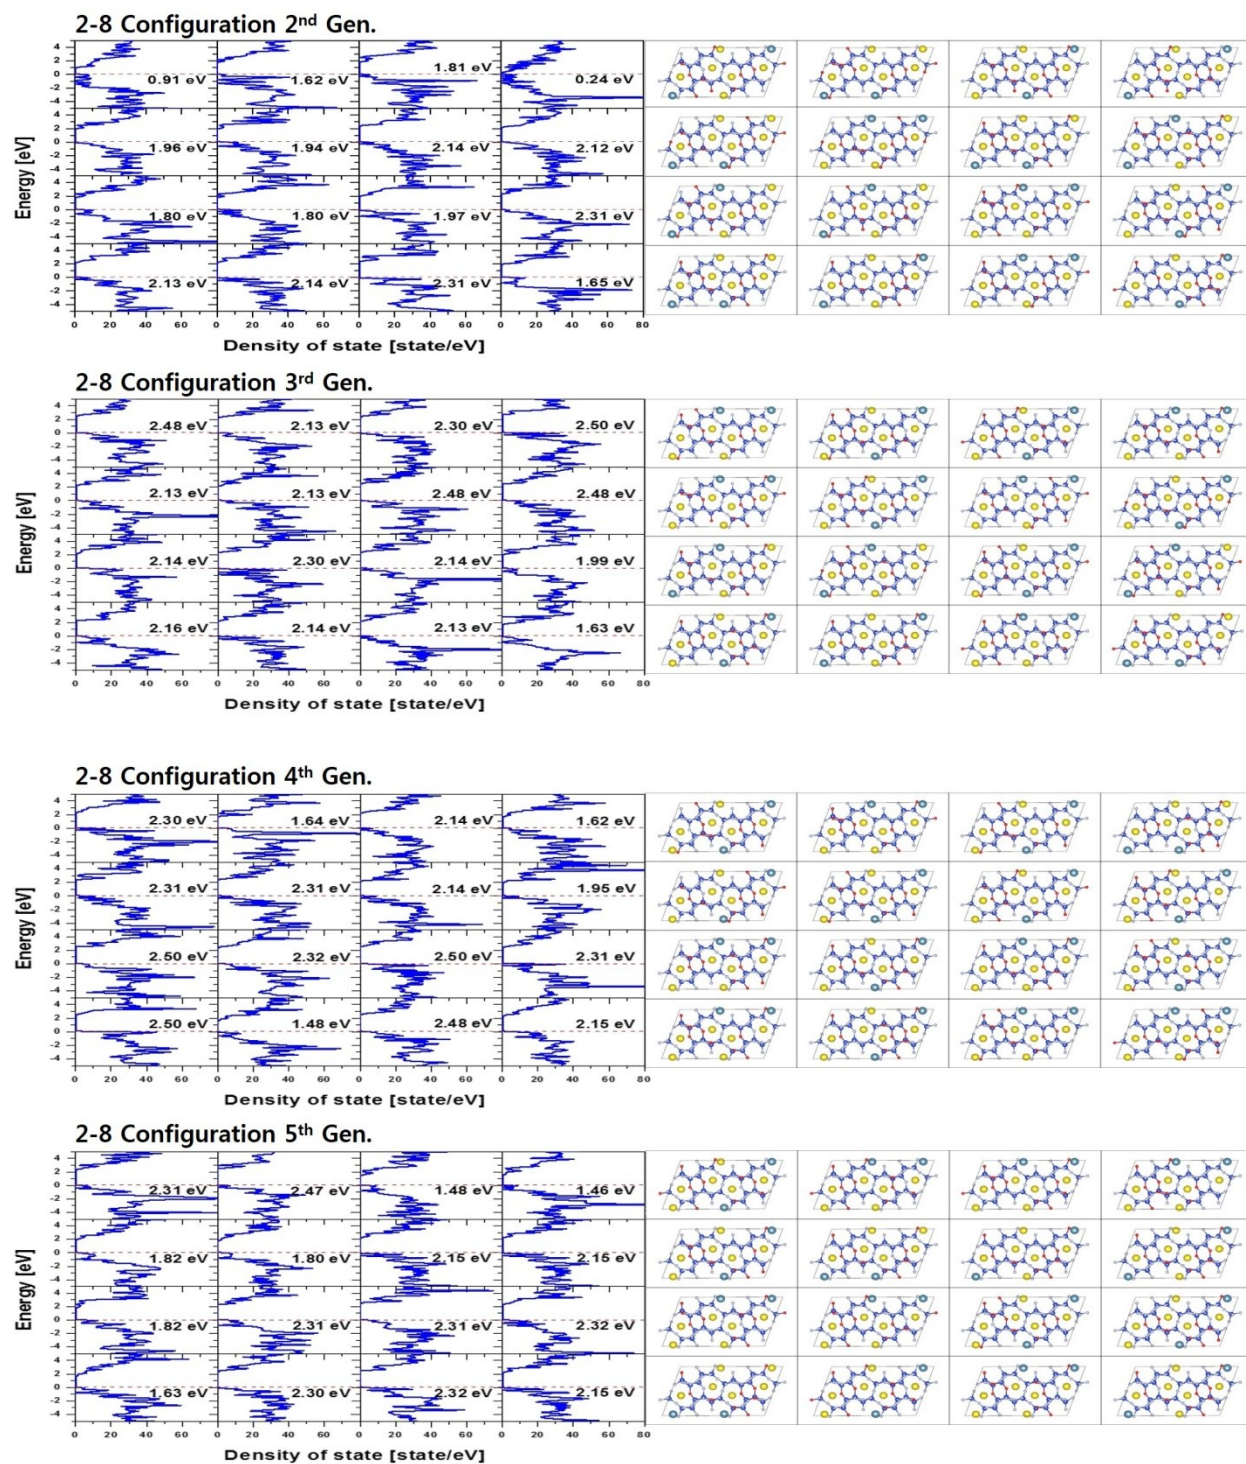

**Fig. S4** Configurations from 2<sup>nd</sup> to 5<sup>th</sup> generation viewed in the b direction, along with total DOS and calculated band gap energies for 2-8 configuration.

### Details of the agreement factors obtained in the Rietveld Refinement using Fullprof program

The indicator in the refinements is generally the various R-factors which are defined as follows<sup>1</sup>:

$$\begin{aligned} \text{(i) R-pattern} & : R_p = 100 \frac{\sum |y_i(obs) - y_i(calc)|}{\sum (y_i(obs))} \\ \text{(ii) R-weighted profile} & : R_{WP} = 100 \left\{ \frac{\sum w_i (y_i(obs) - y_i(calc))^2}{\sum w_i (y_i(obs))^2} \right\}^{1/2} \\ \text{(iii) R-expected} & : R_e = 100 \left[ \frac{(N - P)}{\sum w_i y_{oi}^2} \right]^{1/2} \end{aligned}$$

In the above expressions ' $y_i$ ' is the intensity at any arbitrarily chosen point ' $i$ ',  $w_i = 1/\sigma_i^2$ ,  $\sigma_i^2$  being the variance of the observation, N and P are number of observations and variables respectively.

The goodness of fit of the system is also represented by an indicator called  $\chi$ -squared and expressed as

$$\chi^2 = \left[ \frac{R_{WP}}{R_e} \right]^2$$

### References

1 R. A. Young, *The Rietveld Method*, International Union of Crystallography Oxford University Press, New York (1996).
